# Supplementary material for: Prolonged Administration of Rudgea viburnoides (Cham.) Benth. Prevents Impairment of Redox Status, Renal Dysfunction, and Cardiovascular Damage in 2K1C-Hypertensive Rats by Inhibiting ACE Activity and NO-GMPC Pathway Activation
Source: MDPI journal article supplement (doi:10.3390/pharmaceutics13101579), 2021-09-28
Supplement: s1 [file s1]

Supplementary Material

# Prolonged Administration of *Rudgea viburnoides* (Cham.) Benth. Prevents Impairment of Redox Status, Renal Dysfunction, and Cardiovascular Damage in 2K1C-Hypertensive Rats by Inhibiting ACE Activity and NO-GMPC Pathway Activation

Fernanda Viana Paulin <sup>1</sup>, Rhanany Alan Calloi Palozi <sup>2</sup>, Bethânia Rosa Lorençone <sup>2</sup>, Arthur Ladeira Macedo <sup>1</sup>, Lucas Pires Guarnier <sup>2</sup>, Cleide Adriane Signor Tirloni <sup>2</sup>, Paulo Vitor Moreira Romão <sup>2</sup>, Arquimedes Gasparotto Junior <sup>2</sup> and Denise Brentan Silva <sup>1,\*</sup>

**Citation:** Paulin, F.V.; Palozi, R.A.C.; Lorençone, B.R.; Macedo, A.L.; Guarnier, L.P.; Tirloni, C.A.S.; Romão, P.V.M.; Gasparotto Junior, A.; Silva, D.B. Prolonged Administration of *Rudgea viburnoides* (Cham.) Benth. Prevents Impairment of Redox Status, Renal Dysfunction and Cardiovascular Damage in 2K1C-Hypertensive Rats by Inhibiting ACE Activity and NO-GMPC Pathway Activation. *Pharmaceutics* **2021**, *13*, 1579. <https://doi.org/10.3390/pharmaceutics13101579>

- <sup>1</sup> Laboratório de Produtos Naturais e Espectrometria de Massas (LaPNEM), Faculdade de Ciências Farmacêuticas, Alimentos e Nutrição (FACFAN), Universidade Federal do Mato Grosso do Sul, Campo Grande, 79070-900, Brazil; fernanda@movecor.com.br (F.V.P.); arthur.ladeira@ufms.br (A.L.M.)
- <sup>2</sup> Laboratório de Farmacologia Cardiovascular (LaFaC), Faculdade de Ciências da Saúde, Universidade Federal da Grande Dourados, Dourados, 79825-070, Brazil; palozirhanany@gmail.com (R.A.C.P.); bethaniasalorencone@hotmail.com (B.R.L.); rannier.andrade@outlook.com (L.P.G.); cleide.4132@gmail.com (C.A.S.T.); paulovitor\_moreiraromao@hotmail.com (P.V.M.R.); arquimedesjunior@ufgd.edu.br (A.G.J.)
- \* Correspondence: denise.brentan@ufms.br

Academic Editor: Yasumasa Ikeda

Received: 1 September 2021

Accepted: 26 September 2021

Published: 28 September 2021

**Publisher's Note:** MDPI stays neutral with regard to jurisdictional claims in published maps and institutional affiliations.

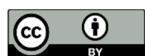

**Copyright:** © 2021 by the authors. Licensee MDPI, Basel, Switzerland. This article is an open access article distributed under the terms and conditions of the Creative Commons Attribution (CC BY) license (<http://creativecommons.org/licenses/by/4.0/>).

**Table S1.** Effects of acute administration of the AERV (30, 300, and 2000 mg/kg) on body weight and food and water consumption at 14th day.

| Parameter                    | Naïve          | AEBP (30 mg/kg) | AEBP (300 mg/kg) | AEBP (2000 mg/kg) |
|------------------------------|----------------|-----------------|------------------|-------------------|
| <i>Food consumption (mL)</i> | 18.27 ± 1.20   | 17.11 ± 1.17    | 18.01 ± 1.12     | 17.86 ± 1.29      |
| <i>Water consumption (g)</i> | 9.17 ± 1.21    | 9.02 ± 1.11     | 8.97 ± 0.99      | 9.04 ± 0.89       |
| <i>Body weight (g)</i>       | 226.33 ± 18.12 | 224.15 ± 15.26  | 231.12 ± 19.11   | 221.19 ± 17.33    |

Statistical analyses were performed by Student's t-test. Values are expressed as mean ± SEM (standard error of the mean) of 8 animals per group

|                                                                                    |                                                                                    |                                                                                     |                                                                                      |
|------------------------------------------------------------------------------------|------------------------------------------------------------------------------------|-------------------------------------------------------------------------------------|--------------------------------------------------------------------------------------|
| 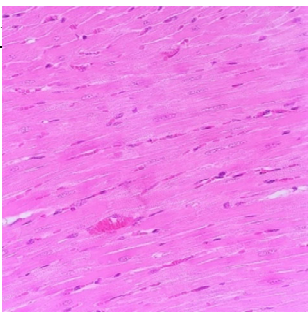  |   |   |   |
| Control, Heart                                                                     | AERV 30, Heart                                                                     | AERV 300, Heart                                                                     | AERV 2000, Heart                                                                     |
|   |   |   |   |
| Control, Liver                                                                     | AERV 30, Liver                                                                     | AERV 300, Liver                                                                     | AERV 2000, Liver                                                                     |
|  |  |  |  |
| Control, Kidney                                                                    | AERV 30, Kidney                                                                    | AERV 300, Kidney                                                                    | AERV 2000, Kidney                                                                    |

**Figure S1.** Representative cross-sections of the heart, liver, and kidney in the control and AERV-treated rats. H&E stain. 40 X.
